# Supplementary material for: The return to 1980 stratospheric halogen levels: A moving target in ozone assessments from 2006 to 2022
Source: Copernicus journal article supplement (doi:10.5194/egusphere-2024-1289), 2024-05-13
Supplement: Supplementary file 1 [file egusphere-2024-1289-supplement.pdf]

## Supplementary Information for:

# The return to 1980 stratospheric halogen levels: A moving target in ozone assessments from 2006 to 2022

Megan J. Lickley<sup>1,2</sup>, John S. Daniel<sup>3</sup>, Laura A. McBride<sup>4</sup>, Ross J., Salawitch<sup>5,6,7</sup>, Guus J.M. Velders<sup>8,9</sup>

<sup>1</sup>Earth Commons, Georgetown University, Washington, DC 20057, USA

<sup>2</sup>Science, Technology, and International Affairs Program, Georgetown University, Washington, DC 20057, USA

<sup>3</sup>Chemical Sciences Laboratory, NOAA, Boulder, CO, 80305-3328, USA

<sup>4</sup>Department of Chemistry and Biochemistry, Albright College, Reading, PA 19612, USA

<sup>5</sup>Department of Chemistry and Biochemistry, University of Maryland College Park, College Park, MD, 20740, USA

<sup>6</sup>Department of Atmospheric and Oceanic Science, University of Maryland College Park, College Park, MD, 20740, USA

<sup>7</sup>Earth System Science Interdisciplinary Center, University of Maryland College Park, College Park, MD, 20740, USA

<sup>8</sup>National Institute for Public Health and the Environment (RIVM), Bilthoven, the Netherlands

<sup>9</sup>Institute for Marine and Atmospheric Research Utrecht, Utrecht University, Utrecht, the Netherlands

*Correspondence to:* Megan J. Lickley (megan.lickley@georgetown.edu)

**Table S1:** Sources of incremental changes (in yrs) to EESC 1980 return date using Engel et al. (2018)

|                                                  | CFC-11 | CFC-12 | Halon-1301 | CCl <sub>4</sub> | Other 12 | Total Change | EESC 1980 Return Date |
|--------------------------------------------------|--------|--------|------------|------------------|----------|--------------|-----------------------|
| 2006 Assessment Initial Return Date              |        |        |            |                  |          |              |                       |
| 2006 Assessment Initial Return Date Engel et al. |        |        |            |                  |          |              | 2053.5                |
| Lifetime Update                                  | +2.2   | +0.1   | +0.3       | +0.9             |          | +3.4         |                       |
| Observed mole fractions since 2006               | -0.6   | +0.3   | +0.3       | +1.0             |          | +1.0         |                       |
| Bank update                                      | +1.8   | +0.8   | +1.4       |                  |          | +3.9         |                       |
| Feedstock emissions                              |        |        |            | +3.1             |          | +3.1         |                       |
| Remaining gases                                  |        |        |            |                  | +1.2     | +1.2         |                       |
| Total updates by gas                             | +3.4   | +1.2   | +1.9       | +5.0             | +1.2     | +12.6        | 2066.1                |
| 2010 Assessment Initial Return Date              |        |        |            |                  |          |              | 2056.9                |
| Lifetime Update                                  | +1.8   | +0.1   | +0.2       | +0.3             |          | +2.6         |                       |
| Observed mole fractions since 2010               | -0.5   | +0.3   | +0.2       | +2.2             |          | +2.2         |                       |
| Bank update                                      | +2.0   | +0.8   | +0.9       |                  |          | +3.7         |                       |
| Feedstock emissions                              |        |        |            | +1.3             |          | +1.3         |                       |
| Remaining gases                                  |        |        |            |                  | -0.5     | -0.5         |                       |
| Total updates by gas                             | +3.3   | +1.2   | +1.3       | +3.8             | -0.5     | +9.2         | 2066.1                |
| 2014 Assessment Initial Return Date              |        |        |            |                  |          |              | 2059.4                |
| Lifetime Update                                  | 0      | 0      | 0          | +0.5             |          | +0.5         |                       |
| Observed mole fractions since 2014               | -0.1   | +0.2   | 0          | +1.3             |          | +1.3         |                       |
| Bank update                                      | +2.2   | +0.7   | +0.7       |                  |          | +3.5         |                       |
| Feedstock emissions                              |        |        |            | +1.2             |          | +1.2         |                       |
| Remaining gases                                  |        |        |            |                  | +0.1     | +0.1         |                       |
| Remaining Updates                                | +2.1   | +0.8   | +0.7       | +2.9             | +0.1     | +6.7         | 2066.1                |
| 2018 Assessment Initial Return Date              |        |        |            |                  |          |              | 2061.9                |
| Lifetime Update                                  | 0      | 0      | 0          | -0.1             |          | -0.1         |                       |
| Observed mole fractions since 2014               | 0      | +0.1   | 0          | +1.0             |          | +1.1         |                       |
| Bank update                                      | +2.3   | +0.7   | +0.7       |                  |          | +3.7         |                       |
| Feedstock emissions                              |        |        |            | -1.7             |          | -1.7         |                       |
| Remaining gases                                  |        |        |            |                  | +1.2     | +1.2         |                       |
| Remaining Updates                                | +2.3   | +0.8   | +0.7       | -0.8             | +1.2     | +4.2         | 2066.1                |

**Table S2: Atmospheric lifetimes (units of yr) for the 16 principal ODSs, given in each SAOD report**

|                                  | WMO 2006 | WMO 2010 | WMO 2014 | WMO 2018 | WMO 2022 |
|----------------------------------|----------|----------|----------|----------|----------|
| CFC-11                           | 45       | 45       | 52       | 52       | 52       |
| CCl <sub>4</sub>                 | 26       | 26       | 26       | 32       | 30       |
| halon-1301                       | 65       | 65       | 72       | 72       | 72       |
| CFC-12                           | 100      | 100      | 102      | 102      | 102      |
| CH <sub>3</sub> Br               | 0.7      | 0.8      | 0.8      | 0.8      | 0.8      |
| CFC-113                          | 85       | 85       | 93       | 93       | 93       |
| halon-2402                       | 20       | 20       | 20       | 28       | 28       |
| HCFC-142b                        | 17.9     | 17.2     | 18       | 18       | 17.1     |
| CH <sub>3</sub> CCl <sub>3</sub> | 5.0      | 5        | 5        | 5        | 5        |
| CFC-114                          | 300      | 190      | 189      | 189      | 189      |
| CFC-115                          | 1700     | 1020     | 540      | 540      | 540      |
| halon-1202                       | 2.9      | 2.9      | 2.9      | 2.5      | 2.5      |
| halon-1211                       | 16       | 16       | 16       | 16       | 16       |
| HCFC-141b                        | 9.3      | 9.2      | 9.4      | 9.4      | 8.81     |
| CH <sub>3</sub> Cl               | 1.0      | 1.0      | 0.9      | 0.9      | 0.9      |
| HCFC-22                          | 12.0     | 11.9     | 11.9     | 11.9     | 11.6     |
